# Supplementary material for: Effects of Ultrasound Treatment on Extraction and Rheological Properties of Polysaccharides from Auricularia Cornea var. Li
Source: PubMed Central journal article supplement (PMC6429225; doi:10.3390/molecules24050939), 2019-03-07
Supplement: molecules-24-00939-s001.pdf [file molecules-24-00939-s001.pdf]

## Effects of Ultrasound Treatment on Extraction and Rheological Properties of Polysaccharides from *Auricularia cornea* var. *Li*.

Yinping Wang <sup>1</sup>, Cuina Wang <sup>1</sup> and Mingruo Guo <sup>2,3,\*</sup>

<sup>1</sup> College of Food Science and Engineering, Jilin University, Changchun, Jilin, 130062, China; ypwang0812@163.com (Y.W.); wangcuina@jlu.edu.cn (C.W.)

<sup>2</sup> Department of Nutrition and Food Science, College of Agriculture and Life Sciences, University of Vermont, Burlington, Vermont 05405, USA

<sup>3</sup> Department of Food Science, Northeast Agricultural University, Harbin, Heilongjiang 150030, China

\* Correspondence: mguo@uvm.edu; Tel.: +1-(802) 656-8168; Fax: +1-802-656-0001

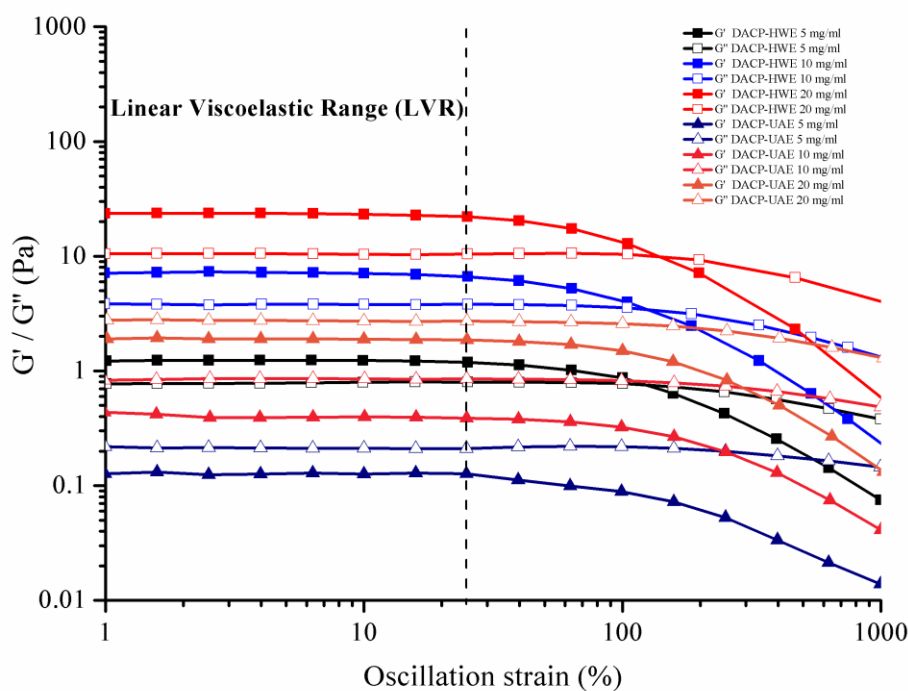

**Figure S1.** The Linear Vicoelastic Range (LVR) of DACP-HWE and DACP-UAE solutions with different concentrations (5, 10, 20 mg/ml).
